# Supplementary material for: Phase-competition-driven formation of hierarchical FeNiZn-MIL-88B-on-MOF-5 octapods displaying high selectivity for the RWGS reaction
Source: Royal Society of Chemistry journal article supplement (doi:10.1039/c9cc03716k), 2019-01-01
Supplement: c9cc03716k1.pdf [file c9cc03716k1.pdf]

## **Electronic Supplementary Information**

### **Phase Competition Driven Formation of Hierarchical FeNiZn- MIL-88B on MOF-5 Octapods with High Selectivity for RWGS Reaction**

Qinwei Zhang, Zuobo Yang, Biaohua Chen\*, Xin Liang\*

## EXPERIMENTAL SECTION

**Materials.** Iron(III) acetylacetonate ( $\text{Fe}(\text{acac})_3$ ) and Nickel(II) acetylacetonate ( $\text{Ni}(\text{acac})_2$ ) were bought from Aladdin Industrial Corp. Zinc nitrate hexahydrate ( $\text{Zn}(\text{NO}_3)_2 \cdot 6\text{H}_2\text{O}$ ) and polyvinylpyrrolidone (PVP,  $K_w=30$ ) were purchased from Sinopharm Chemical Reagent Co., Ltd. Benzenedicarboxylic acid ( $\text{H}_2\text{BDC}$ ), N,N-Dimethylformamide (DMF) and ethanol were purchased from Beijing Chemical Reagent Factory. All chemical reagents were at analytical purity level without additional purification.

**Synthesis.** For a typical synthesis of octapods-FeNiZn MOF materials,  $\text{Fe}(\text{acac})_3$  (120 mg),  $\text{Ni}(\text{acac})_2$  (60 mg),  $\text{Zn}(\text{NO}_3)_2 \cdot 6\text{H}_2\text{O}$  (92.8 mg),  $\text{H}_2\text{BDC}$  (38.4 mg) and PVP (650 mg) were dissolved in the DMF-ethanol mixture ( $V_{\text{DMF}}/V_{\text{ethanol}} = 32 \text{ mL}/19.2 \text{ mL}$ ) with magnetic stirring for 30 min to form a uniform solution. The  $\text{Fe}^{3+}/\text{Ni}^{2+}$  molar ratio was 1.5/1. Then, the mixture solutions were transferred into a 100 mL Teflon-lined stainless-steel autoclave and heated at 100 °C for 6 h. After cooling naturally at room temperature, the products were collected and washed with DMF and ethanol via centrifugation at 10000 rpm for several times. The products were dried in a vacuum oven at 70 °C for 12 h. Meanwhile, when tuning  $\text{Fe}^{3+}/\text{Ni}^{2+}$  molar ratio with 2/1 ( $\text{Fe}(\text{acac})_3/\text{Ni}(\text{acac})_2 = 164 \text{ mg}/60 \text{ mg}$ ), flower-FeNiZn MOFs were successfully prepared. Adjusting  $\text{Fe}^{3+}/\text{Ni}^{2+}$  molar ratio with 1/2 ( $\text{Fe}(\text{acac})_3/\text{Ni}(\text{acac})_2 = 82 \text{ mg}/120 \text{ mg}$ ), cube-FeNiZn MOFs were synthesized. Other reaction conditions were in agreement with octapods-FeNiZn MOFs synthesis procedure. As for the synthesis of the contrast samples, the preparation of FeZn MOFs and NiZn MOFs were carried out without adding  $\text{Ni}(\text{acac})_2$  or  $\text{Fe}(\text{acac})_3$  based on the octapods-FeNiZn MOFs synthesis. The FeNiZnOx materials were prepared by calcining the mixture of  $\text{Fe}(\text{acac})_3$  (120 mg),  $\text{Ni}(\text{acac})_2$  (60 mg),  $\text{Zn}(\text{NO}_3)_2 \cdot 6\text{H}_2\text{O}$  (92.8 mg) and PVP (650 mg) in the Muffle furnace at 350 °C for 2 h.

**Characterization.** The phase composition information of as-prepared materials were collected from powder X-ray diffraction (XRD) measurements on a Bruker D8 diffractometer with Cu K $\alpha$  source. The shape and size of materials were observed on Transmission electron microscope (TEM) (HT7700) and Scanning electron microscope (SEM) (Hitachi S4700). The elemental mapping images were obtained on JEOL-JEM-2100F transmission electron microscope equipped with energy dispersive X-ray spectrometer (EDS) system. The surface compositions of samples were gathered from X-ray photoelectron spectroscopy (XPS) results, recorded on a Thermo Fisher ESCALAB XPS system at Al K $\alpha$  X-ray source. The Fourier transform infrared (FT-IR) spectra were performed using Bruker TENSOR27 FTIR Spectrometric analyzer at room temperature. The thermogravimetric (TG) analysis were measured under nitrogen flows with a heating rate of 10 $^{\circ}$ /min from 30  $^{\circ}$ C to 800  $^{\circ}$ C using TGA Q500.

**Activity test of catalysts.** The RWGS reactions were conducted in a continuous fixed-bed flow reactor. Inside, the catalyst bed was packed up at a constant temperature section with quartz sand supported. Reaction gas mixture were composed of 14.9% CO<sub>2</sub>, 60.2% H<sub>2</sub> and 24.9% Ar. Before reactions, all the catalysts were activated under H<sub>2</sub> (99.999%) flow of 25 mL/min at 350  $^{\circ}$ C for 2 h. After pretreatments, with the temperature cooling below 200  $^{\circ}$ C, the gas mixture was switched with 10 mL/min in the reaction system. The catalytic performance of as-prepared samples were measured every 50  $^{\circ}$ C based on 200  $^{\circ}$ C until 400  $^{\circ}$ C. Finally, the gas products were monitored on line using Varian CP-3800 with thermal conductivity detector (TCD) using an internal standard method. The analyzing conditions were as follows: column temperature, 100  $^{\circ}$ C; detector temperature, 150  $^{\circ}$ C; carrier gas, helium.

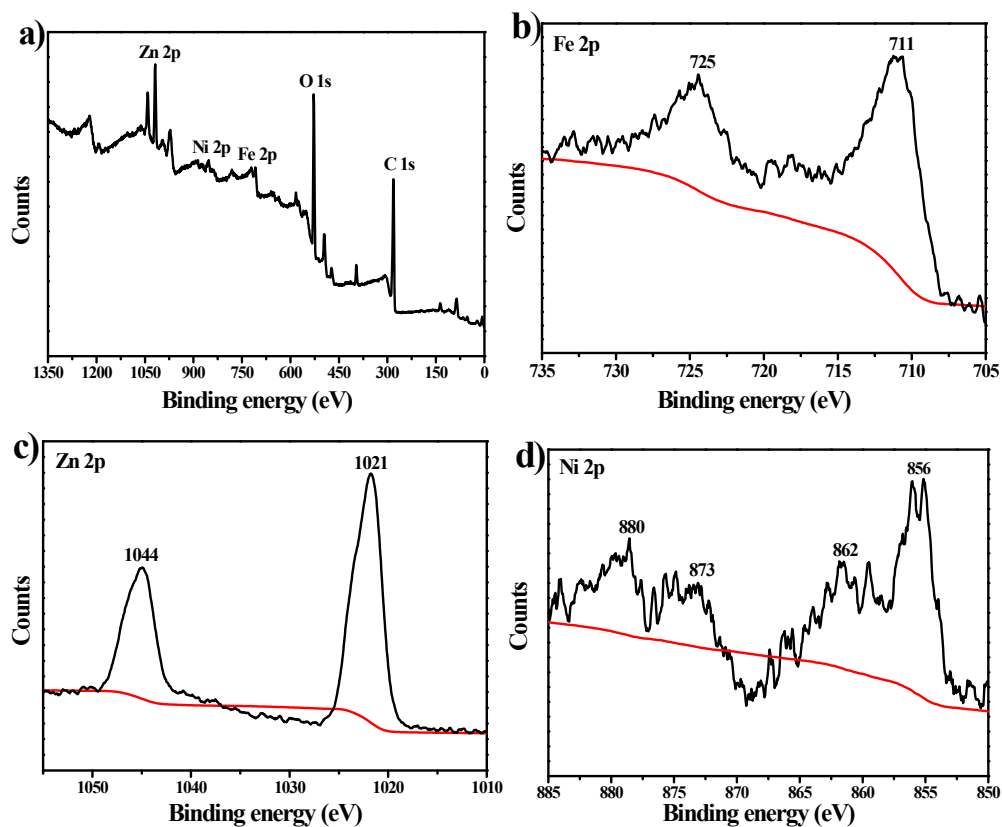

**Fig. S1** XPS spectra of octapods-FeNiZn MOFs. (a) the survey spectrum; (b) Fe 2p spectrum; (c) Ni 2p spectrum and (d) Zn 2p spectrum.

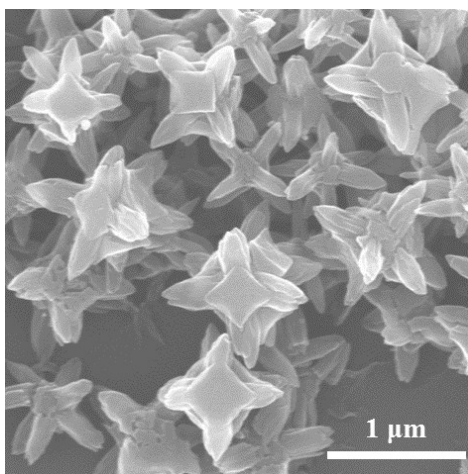

**Fig. S2** SEM image of octapods-FeNiZn MOFs

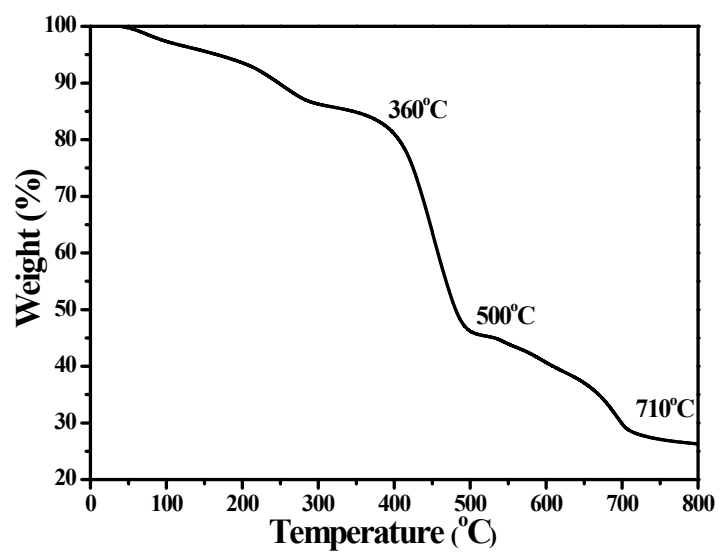

**Fig. S3** TG curve of octapods-FeNiZn MOFs.

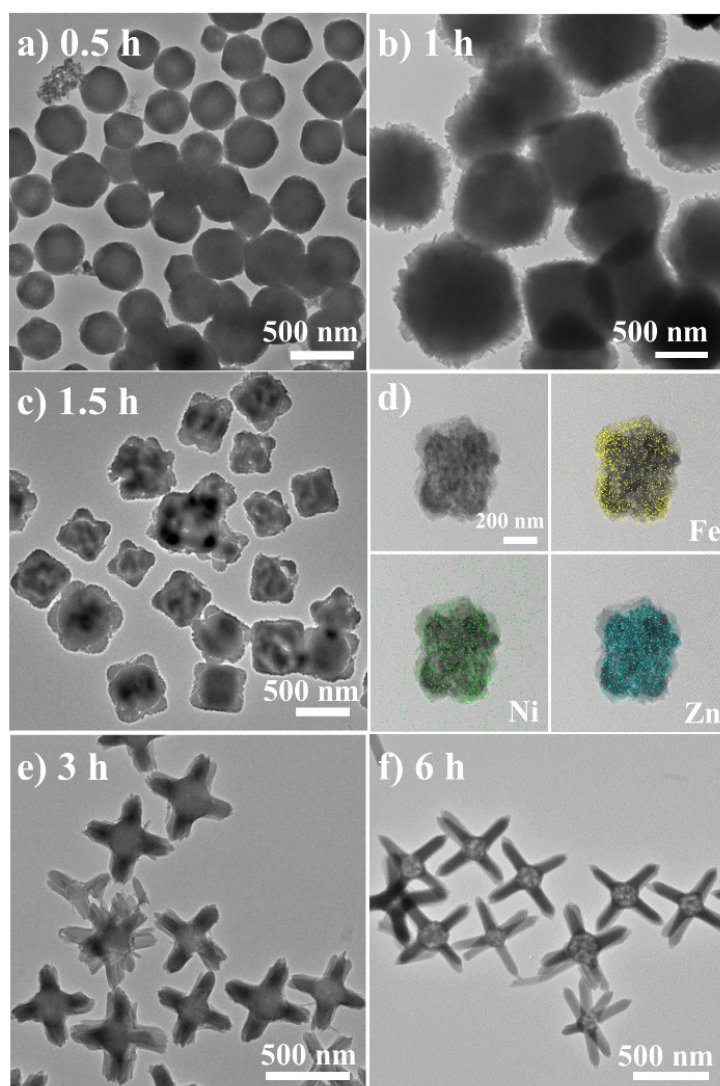

**Fig. S4** TEM images of octapods-FeNiZn MOFs prepared under different reaction times. (a) 0.5 h, (b) 1 h, (c) 1.5 h, (d) EDX mapping analysis of 1.5 h samples, (e) 3 h, (f) 6 h.

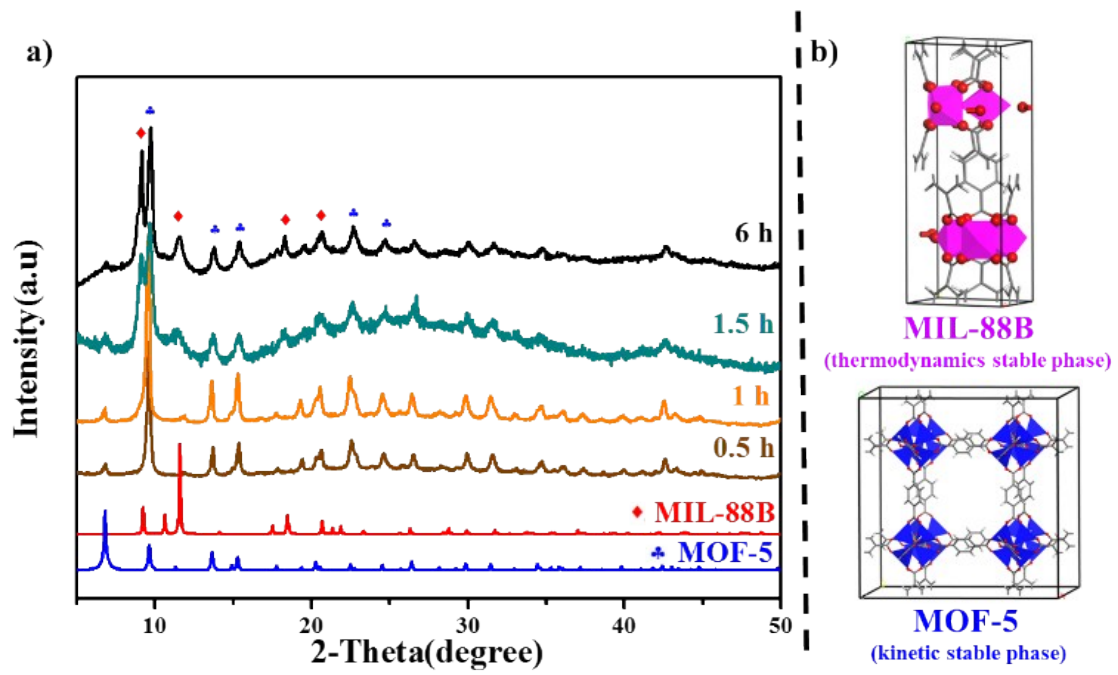

**Fig. S5** (a) XRD patterns of octapods under different reaction times. (b) the schematic model of structure evolution.

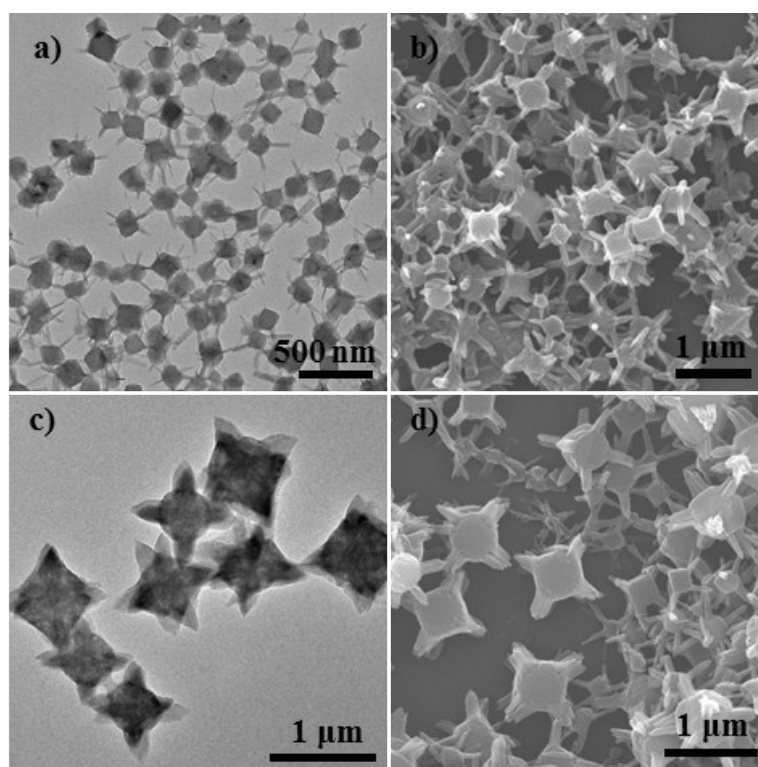

**Fig. S6** TEM and SEM images of samples prepared with different  $\text{Fe}^{3+}/\text{Ni}^{2+}$  molar ratio (a-b) 1/1, (c-d) 1/1.5.

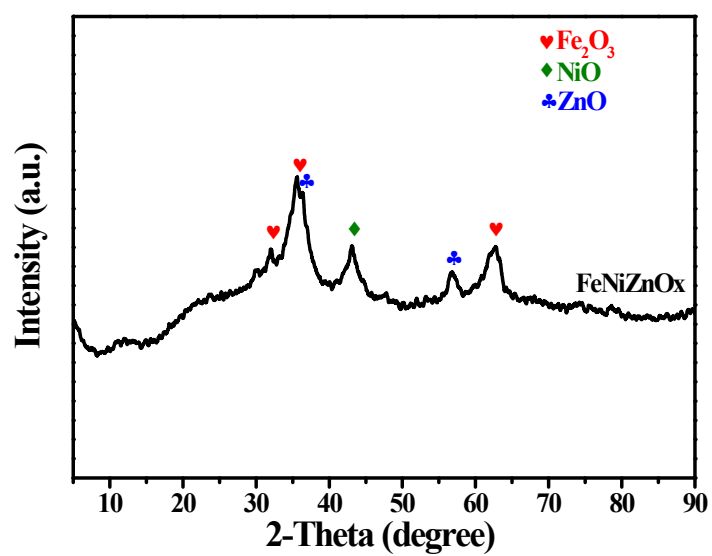

**Fig. S7** XRD pattern of  $\text{FeNiZnOx}$  sample.



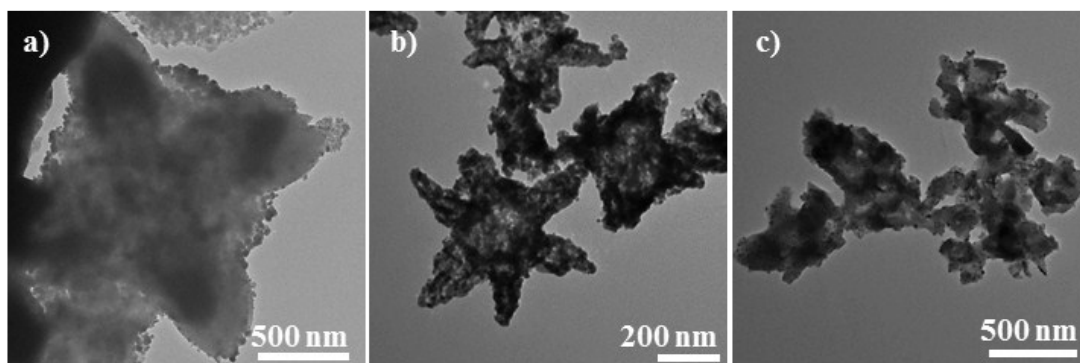

**Fig. S8** TEM images after H<sub>2</sub> pretreatment at 350 °C for 2 h (a) flower-FeNiZn MOFs. (b) octapods-FeNiZn MOFs. (c) cube-FeNiZn MOFs.

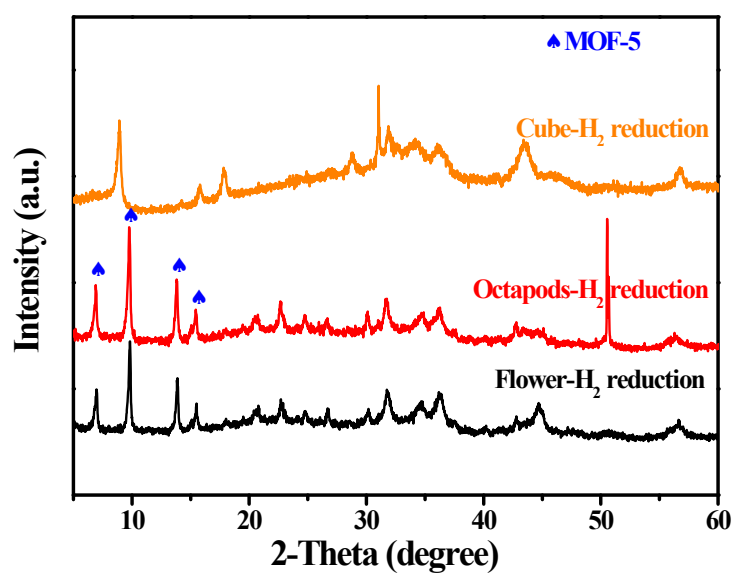

**Fig. S9** XRD patterns of samples after H<sub>2</sub> reduction at 350 °C for 2 h.

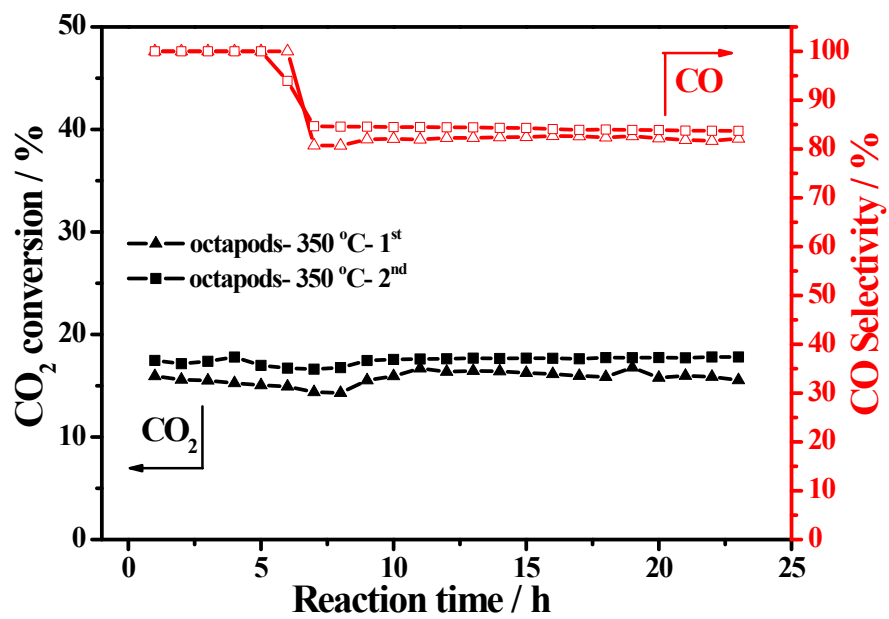

**Fig. S10** Long-term stability tests of octapods-FeNiZn MOFs at 350 °C for 22 h.

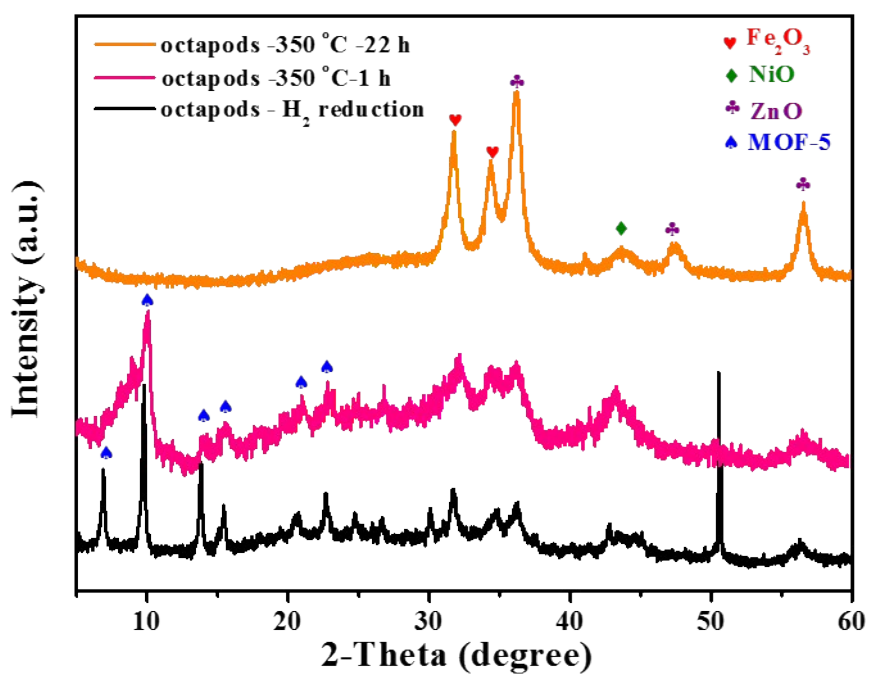

**Fig. S11** XRD patterns of octapods after H<sub>2</sub> reduction, reacting 1 h at 350 °C and long-term tests for 22 h at 350 °C.

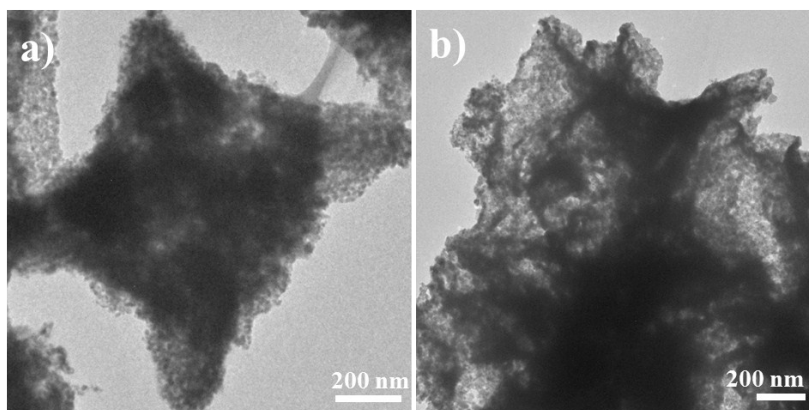

**Fig. S12** TEM images (a) octapods-FeNiZn MOFs after reacting 1 h at 350 °C, (b) octapods-FeNiZn MOFs after long-term tests for 22 h at 350 °C.

**Table S1.** Comparison of RWGS catalytic performance of the reported catalysts.

| Catalyst                             | T<br>(°C)  | P<br>(MPa) | H <sub>2</sub> /CO <sub>2</sub> | CO <sub>2</sub><br>conversion<br>(%) | CO<br>selectivity<br>(%) | Ref.             |
|--------------------------------------|------------|------------|---------------------------------|--------------------------------------|--------------------------|------------------|
| CuSiO/CuOx                           | 350        | 0.1        | 3/1                             | 2.2                                  | /                        | 1                |
| Pt/MOF-74                            | 350        | 2          | 3/1                             | 1.9                                  | 100                      | 2                |
| 4-Pt/Au@Pd@1Co                       | 350        | 2          | 3/1                             | 9.38                                 | 76.3                     | 3                |
| 1.6%Ru@mSiO <sub>2</sub> -N          | 350        | /          | 4/1                             | 9.4                                  | 88.1                     | 4                |
| CuOx/CeO <sub>2</sub>                | 400        | 0.1        | 1/1                             | 16                                   | 100                      | 5                |
| 10%Pd/Al <sub>2</sub> O <sub>3</sub> | 400        | /          | 3/1                             | 35                                   | 11.4                     | 6                |
| 10%Co/CeO <sub>2</sub>               | 400        | /          | 1/1                             | 10                                   | 93                       | 7                |
| Pt/Au@Pd@UIO-66                      | 400        | 2          | 3/1                             | 27.3                                 | 73                       | 8                |
| Au@UIO-67-H <sub>2</sub>             | 408        | 0.1        | 3/1                             | 3                                    | /                        | 9                |
| Co/Mo <sub>2</sub> C                 | 300        | /          | 2/1                             | 9.5                                  | /                        | 10               |
| <b>Octapods-</b>                     | <b>350</b> | <b>0.1</b> | <b>3/1</b>                      | <b>16.51</b>                         | <b>100</b>               | <b>this work</b> |
| <b>FeNiZn MOF</b>                    | <b>400</b> | <b>0.1</b> | <b>3/1</b>                      | <b>29.9</b>                          | <b>81.05</b>             | <b>this work</b> |
| Cube-                                | 350        | 0.1        | 3/1                             | 11.29                                | 95.46                    | this work        |
| FeNiZn MOF                           | 400        | 0.1        | 3/1                             | 23.93                                | 90.24                    | this work        |
| Flower-                              | 350        | 0.1        | 3/1                             | 6.9                                  | 100                      | this work        |
| FeNiZn MOF                           | 400        | 0.1        | 3/1                             | 14.74                                | 79.69                    | this work        |
|                                      | 350        | 0.1        | 3/1                             | 38.13                                | 24.16                    | this work        |
| FeNiZnOx                             | 400        | 0.1        | 3/1                             | 41.58                                | 30.17                    | this work        |

## References

1. Y. Yu, R. Jin, J. Easa, W. Lu, M. Yang, X. Liu, Y. Xing and Z. Shi, *Chem. Commun.*, 2019, **55**, 4178-4181.
2. Y. Han, H. Xu, Y. Su, Z.-l. Xu, K. Wang and W. Wang, *J. Catal.*, 2019, **370**, 70-78.
3. X. Zhao, H. Xu, X. Wang, Z. Zheng, Z. Xu and J. Ge, *ACS Appl. Mater. Interfaces*, 2018, **10**, 15096-15103.
4. J. Dou, Y. Sheng, C. Choong, L. Chen and H. C. Zeng, *Appl. Catal., B*, 2017, **219**, 580-591.
5. M. Ronda-Lloret, S. Rico-Francés, A. Sepúlveda-Escribano and E. V. Ramos-Fernandez, *Appl. Catal., A*, 2018, **562**, 28-36.
6. J. H. Kwak, L. Kovarik and J. n. Szanyi, *ACS Catal.*, 2013, **3**, 2094-2100.
7. L. Wang, H. Liu, Y. Chen and S. Yang, *Int. J. Hydrogen Energy*, 2017, **42**, 3682-3689.
8. Z. Zheng, H. Xu, Z. Xu and J. Ge, *Small*, 2018, **14**, 1702812.
9. H. Xu, Y. Li, X. Luo, Z. Xu and J. Ge, *Chem. Commun.*, 2017, **53**, 7953-7956.
10. M. D. Porosoff, X. Yang, J. A. Boscoboinik and J. G. Chen, *Angew. Chem., Int. Ed.*, 2014, **53**, 6705-6709.
